# Supplementary material for: Handling stress may confound murine gut microbiota studies
Source: PeerJ. 2017 Jan 11;5:e2876. doi: 10.7717/peerj.2876 (PMC5234434; doi:10.7717/peerj.2876)
Supplement: Data S2 [file peerj-05-2876-s002.xlsx]

## Sheet: Sorted
Sample	Bacteroidetes	Bacteroides	Firmicutes	Bifidobacteria (without outlier)	Sample Type				Total
M1	3.82816	4.46283	4.47973	2.74948	Males				15.5202
M2	3.92575	4.59404	3.9302	-2.00582	Males				10.4442
M3	3.19484	3.70328	3.85679	-0.0341703	Males				10.7207
M4	4.2304	4.69517	4.20061	3.23232	Males				16.3585
RF1_14	4.02439	4.74247	6.54258	3.11997	Rachel				18.4294
RF2_14	3.96817	4.71594	6.79897	2.46104	Rachel				17.9441
RF3_14	3.75732	4.62524	6.19858	3.06711	Rachel				17.6483
RF3_14	3.51044	4.61391	6.76386	2.85171	Rachel				17.7399
RF7_20	4.02566	4.70272	6.2483	2.69006	Rachel				17.6667
RF9_20	4.0316	4.66348	6.15998	-0.424868	Rachel				14.4302
RF10_20	3.73253	4.6241	6.68436	2.92357	Rachel				17.9646
R_M1_DAM	3.48849	4.4915	6.05476	1.67807	Rachel				15.7128
R_M2_DAM	3.59914	4.56366	6.29962	1.88028	Rachel				16.3427
1_7	0.170445	0.709413	1.29548	-1.20295	Water, passive				0.972381
1_14	3.41297	4.05062	4.62359	-1.10135	Water, passive				10.9858
1_21_1	3.28555	3.78252	3.94983	-1.78724	Water, passive				9.23067
1_21_2	3.88254	4.3506	4.4518	-1.61676	Water, passive				11.0682
1_21_3	3.38141	4.46916	4.02496	-1.68373	Water, passive				10.1918
1_21_4	1.9516	2.59042	3.78286	-1.26351	Water, passive				7.06137
			3.9874
5_7	0.0379451	0.344365	3.49737
5_14	2.10645	2.00974	4.67499	0.0398646	Water, active				8.83104
5_21_1	3.82556	4.36402	4.63983	-2.85912	Water, active				9.97029
5_21_2	3.59083	4.3914	4.63261	-2.51184	Water, active				10.103
2_7	0.0681884	0.518115	4.3282	-1.75515	FOS, active				3.15936
2_14	3.54759	4.06957	4.86194	-1.02265	FOS, active				11.4564
2_21_1	4.09701	4.46212	5.08672	-2.22244	FOS, active				11.4234
2_21_2	3.85298	4.44737	4.73202	-2.15041	FOS, active				10.882
2_21_3	3.64303	4.46198	5.0944	1.4184	FOS, active				14.6178
2_21_4	3.22153	4.00052	4.7195	-1.52403	FOS, active				10.4175
			4.79698
4_7	-0.659653	-0.0254799		-1.52932	FOS, passive				-2.21446
4_14	0.23631	0.593955	3.9411	-2.30624	FOS, passive				2.46513
4_21_1	3.64182	4.27248	4.38892	-1.62635	FOS, passive				10.6769
4_21_2	3.66995	4.4149	4.39901	-1.46565	FOS, passive				11.0182
4_21_3	3.71735	4.48284	4.84476	-1.49323	FOS, passive				11.5517
4_21_4	3.89548	4.46364	4.86951	-1.03644	FOS, passive				12.1922
F1_DAM	3.82745	4.34882	4.63991	-0.936805	Water, passive dam				11.8794
F5_DAM	4.00329	4.43918	4.89433	-1.56546	Water, active dam				11.7713
F2_DAM	3.65319	4.48319	4.90838	-1.46012	FOS, active dam				11.5846
F4_DAM	4.09965	4.69218	5.25462	-1.64373	FOS, passive dam				12.4027
F3_DAM	3.64722	4.36798	4.8582	-2.75036	No litter				10.123
